# Supplementary material for: MoS2and Janus (MoSSe) based 2D van der Waals heterostructures: emerging direct Z-scheme photocatalysts
Source: Royal Society of Chemistry journal article supplement (doi:10.1039/d1na00154j), 2021-01-01
Supplement: d1na00154j1.pdf [file d1na00154j1.pdf]

Supplemental Material for  
“MoS<sub>2</sub> and Janus (MoSSe) Based 2D van der Waals Heterostructures: Emerging  
Direct Z-scheme Photocatalysts”

Arunima Singh\*, Manjari Jain, Saswata Bhattacharya\*  
*Department of Physics, Indian Institute of Technology Delhi, New Delhi 110016, India*

I. ELECTROSTATIC POTENTIAL

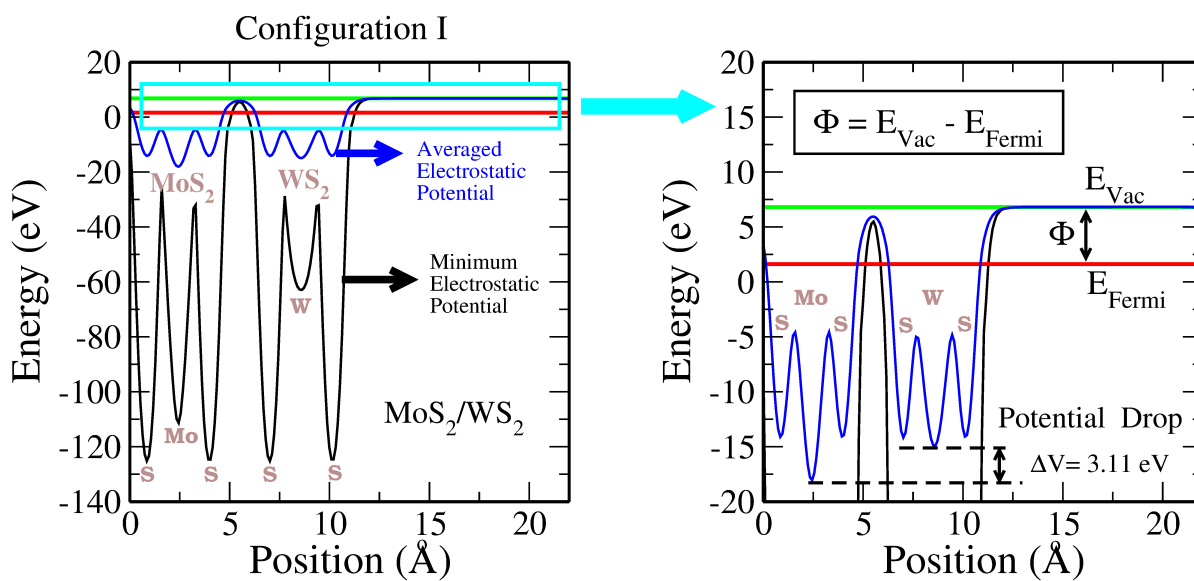

Fig.S 1: Schematic of electrostatic potential as obtained corresponding to MoS<sub>2</sub>/WS<sub>2</sub> vdW HTS.

\* Arunima.Singh@physics.iitd.ac.in [AS], saswata@physics.iitd.ac.in [SB]

## Averaged Electrostatic Potential

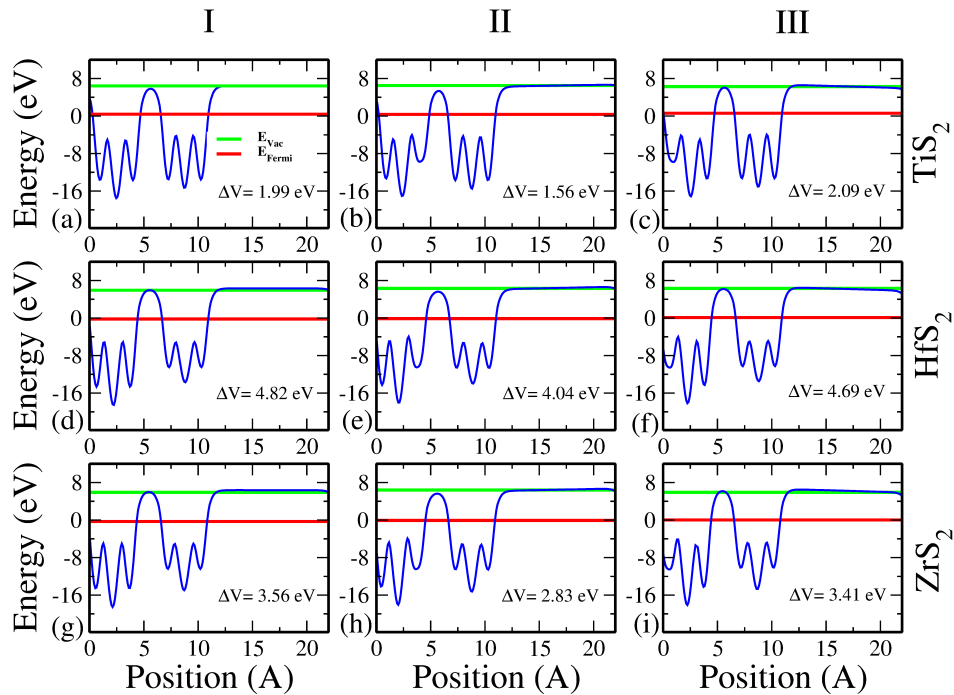

Fig.S 2: Averaged electrostatic potential corresponding to TMDs viz. TiS<sub>2</sub> (upper panel), HfS<sub>2</sub> (middle panel) and ZrS<sub>2</sub> (lower panel) for I, II and III configurations.

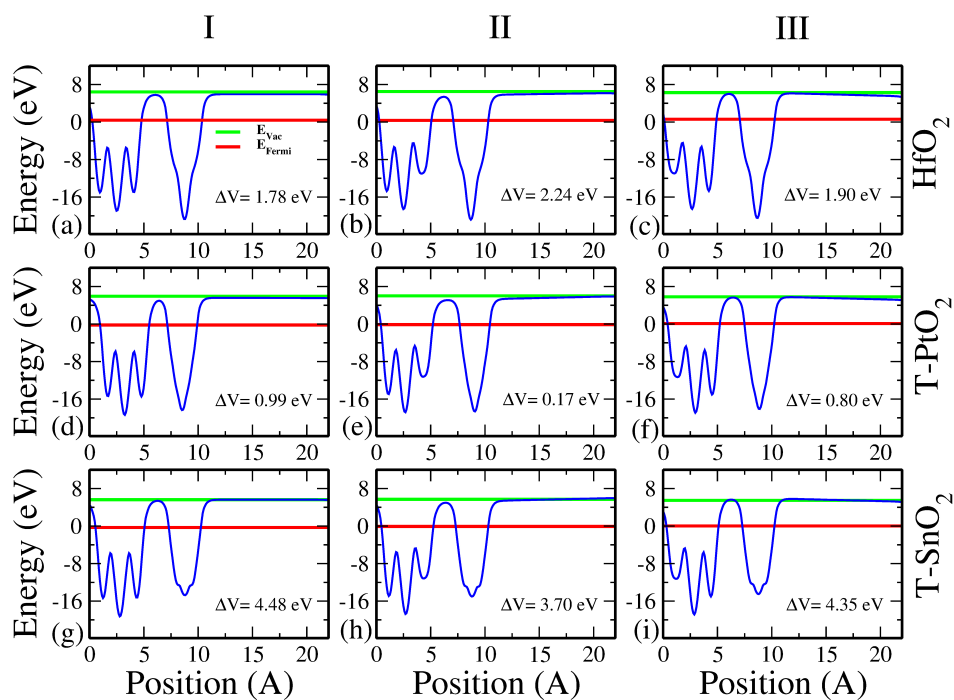

Fig.S 3: Averaged electrostatic potential corresponding to TMOs viz. HfO<sub>2</sub> (upper panel), T-SnO<sub>2</sub> (middle panel) and T-PtO<sub>2</sub> (lower panel) for I, II and III configurations.

## Minimum Electrostatic Potential

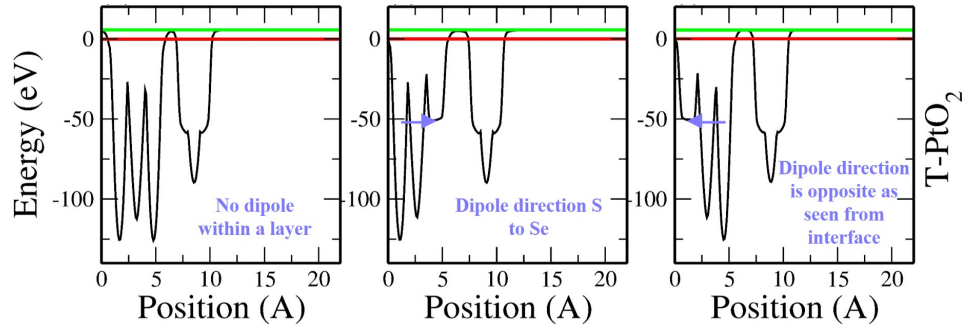

Fig.S 4: Electrostatic potential of T-PtO<sub>2</sub> for I, II and III configurations, showing dipole direction at the interface.

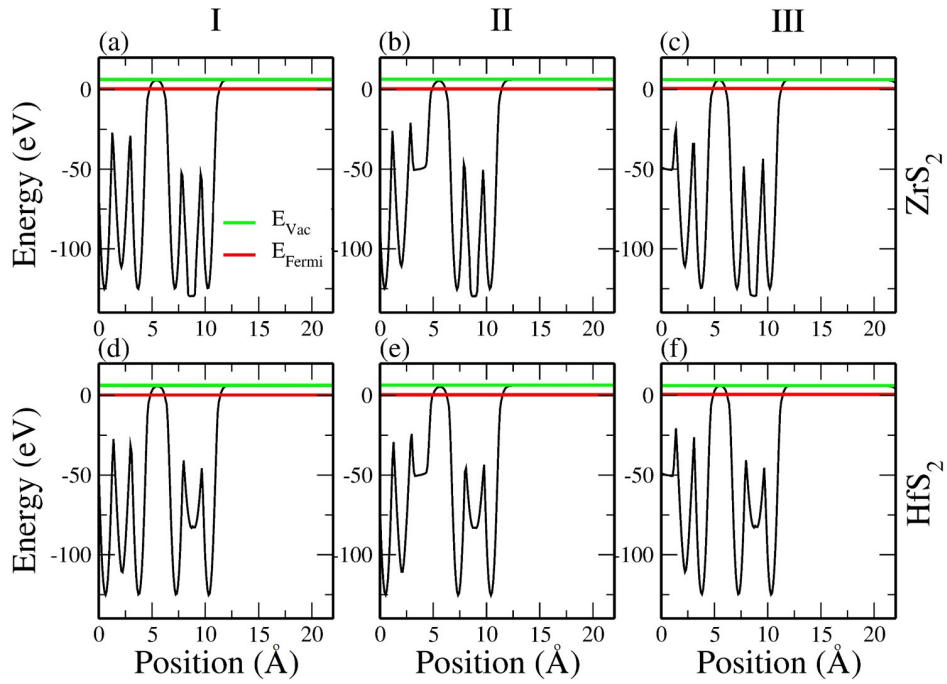

Fig.S 5: Electrostatic potential corresponding to ZrS<sub>2</sub> (upper panel) and HfS<sub>2</sub> (lower panel) for I, II and III configurations.

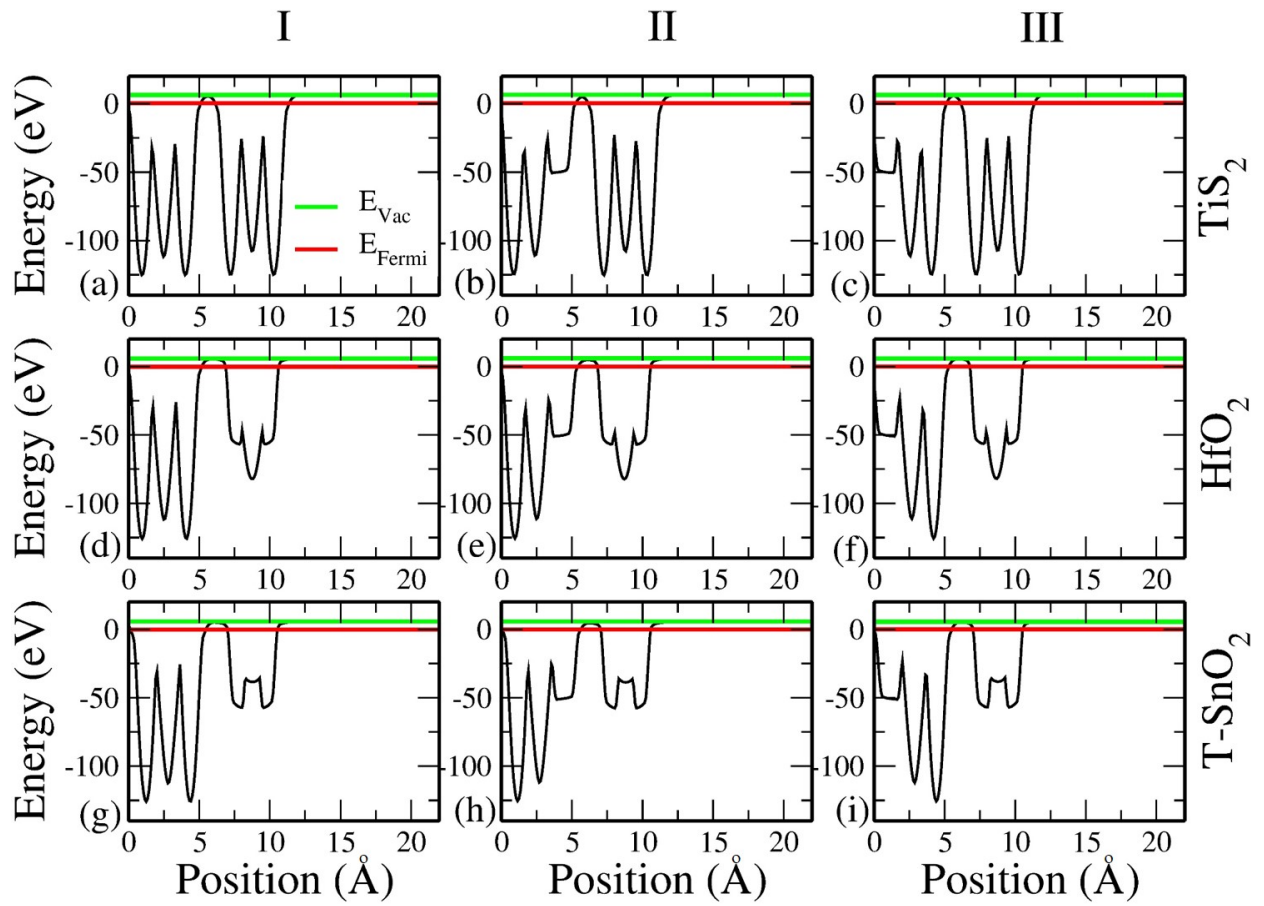

Fig.S 6: Electrostatic potential corresponding to  $\text{TiS}_2$  (upper panel),  $\text{HfO}_2$  (middle panel) and  $\text{SnO}_2$  (lower panel) for I, II and III configurations.



## II. LATTICE PARAMETERS

TABLE I: Lattice constants (l) of  $2\times 2$  monolayers

| $BX_2$ | MoS <sub>2</sub> | WS <sub>2</sub> | ZrS <sub>2</sub> | HfS <sub>2</sub> | TiS <sub>2</sub> | HfO <sub>2</sub> | T-PtO <sub>2</sub> | T-SnO <sub>2</sub> |
|--------|------------------|-----------------|------------------|------------------|------------------|------------------|--------------------|--------------------|
| l      | 6.321            | 6.321           | 7.120            | 7.019            | 6.660            | 6.243            | 6.296              | 6.450              |

## III. BAND GAPS OF CONFIGURATIONS

TABLE II: Band gaps of the monolayers and their corresponding vdW HTSs.

| $BX_2$             | Band Gap (eV) (Indirect/Direct) |             |             |             |
|--------------------|---------------------------------|-------------|-------------|-------------|
|                    | Monolayer                       | I           | II          | III         |
| MoS <sub>2</sub>   | -/2.257                         | -           | -           | -           |
| MoSSe              | -/2.172                         | -           | -           | -           |
| WS <sub>2</sub>    | -/2.447                         | 1.636/2.038 | 1.879/1.885 | 1.589/1.928 |
| ZrS <sub>2</sub>   | 1.829/1.892                     | 0.752/0.809 | 0.123/0.177 | 0.676/0.729 |
| HfS <sub>2</sub>   | 1.937/2.019                     | 0.746/0.863 | 0.079/0.185 | 0.663/0.773 |
| TiS <sub>2</sub>   | 1.672/1.769                     | 0.414/0.418 | 0.047/0.056 | 0.520/0.525 |
| HfO <sub>2</sub>   | 3.516/3.520                     | 0.486/0.499 | 0.072/0.090 | 0.440/0.453 |
| T-PtO <sub>2</sub> | 3.304/3.313                     | 1.323/1.525 | 0.595/0.846 | 1.178/1.423 |
| T-SnO <sub>2</sub> | 4.143/4.297                     | 1.130/1.285 | 0.460/0.882 | 1.069/1.473 |

#### IV. BANDSTRUCTURES OF Z-SCHEME VDW HTSS

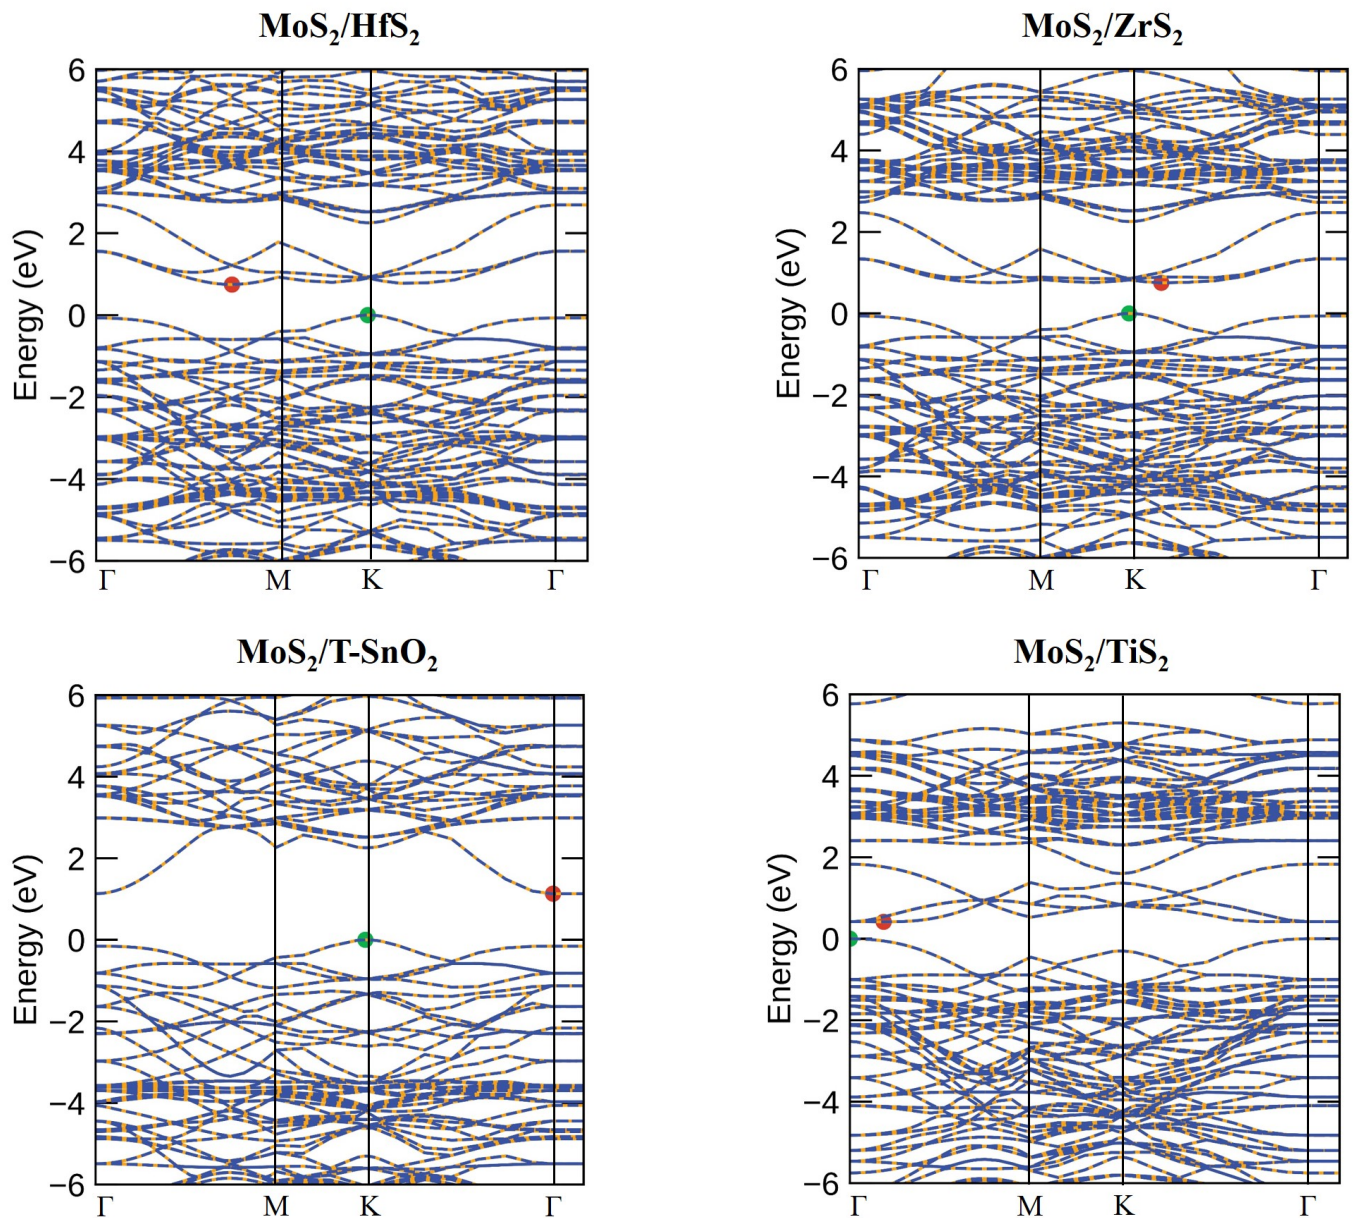

Fig.S 7: (Color online) Bandstructures corresponding to the supercell of MoS<sub>2</sub>/BX<sub>2</sub> HTSS (configuration I) where MoS<sub>2</sub>/ZrS<sub>2</sub> has similar bandstructure as that of MoS<sub>2</sub>/HfS<sub>2</sub>. The bandstructures corresponding to the MoS<sub>2</sub> based vdW HTSS (configurations II and III) are similar with slight change in energetics. The red and green points correspond to the conduction band minimum and valence band maximum.

## v. PLANAR AVERAGED CHARGED DENSITY

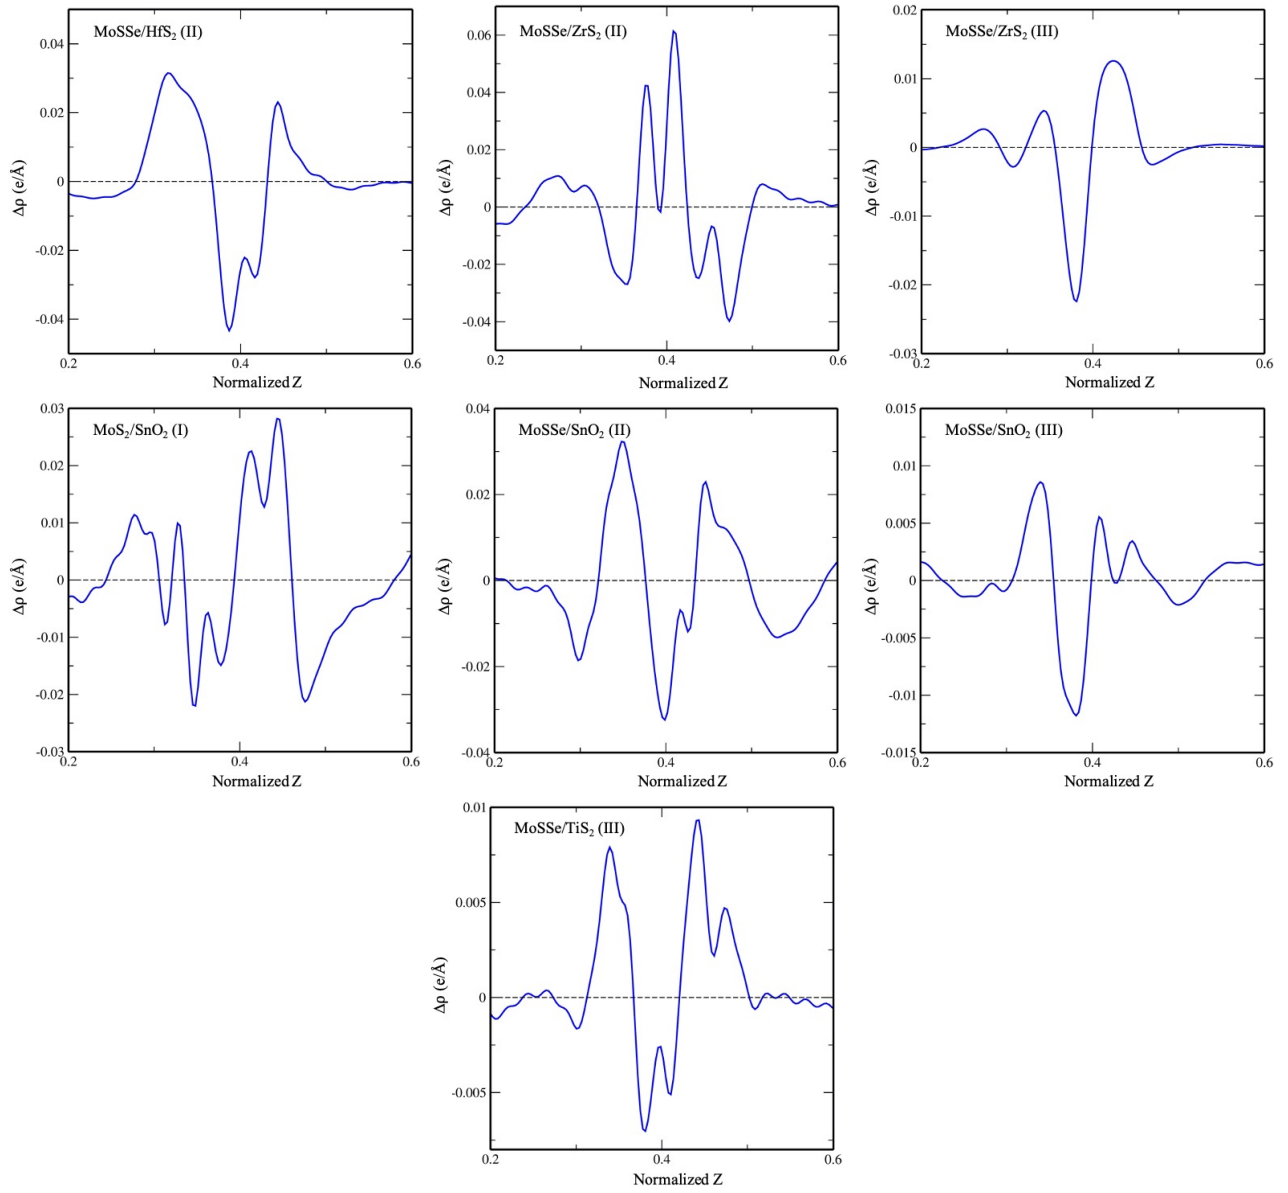

Fig.S 8: (Color online) Planar averaged charge density

## VI. ABSORPTION SPECTRA OF MONOLAYERS

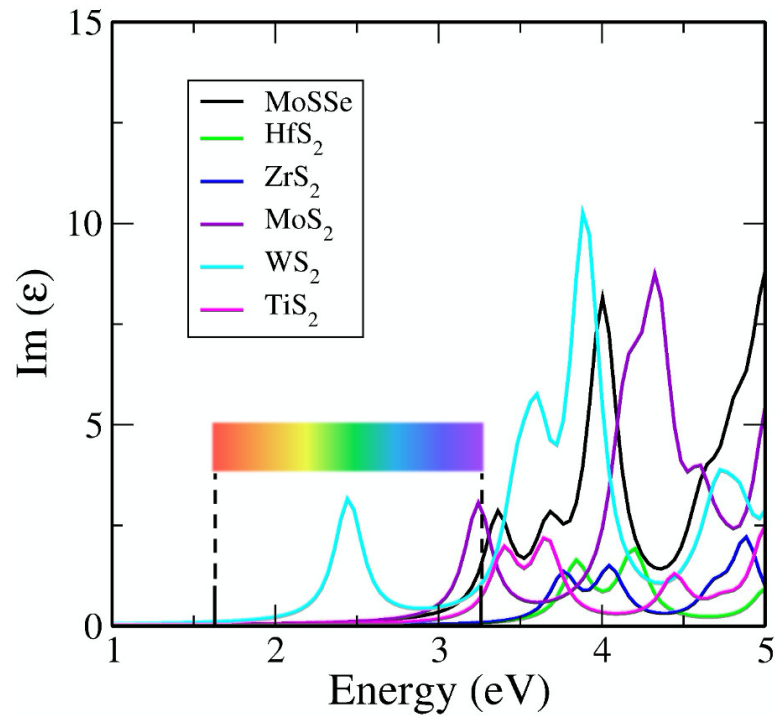

Fig.S 9: Absorption spectra of Janus (MoSSe) and monolayer TMDs i.e MoS<sub>2</sub>, WS<sub>2</sub>, TiS<sub>2</sub>, HfS<sub>2</sub> and ZrS<sub>2</sub>

## VII. EXCITON BINDING ENERGY

We have performed mBSE calculations, with an intention to simply compare the exciton binding energy ( $E_B$ ) of vdW HTSs with MoS<sub>2</sub> and MoSSe. We have included four valence and conduction bands for mBSE on top of hybrid functional. However, there is a huge scope in understanding the excitonic transitions in these systems with different computational approaches. Presently, considering the Z-scheme application, the smaller  $E_B$  of vdW HTSs as compared to MoS<sub>2</sub> (or MoSSe) would allow more  $e^- - h^+$  recombination in vdW HTS thereby facilitating MoS<sub>2</sub> (or MoSSe) for HER.

TABLE III: Exciton binding energies of vdW HTSs, MoS<sub>2</sub> and MoSSe monolayers

|            | MoS <sub>2</sub> | MoSSe | MoSSe/HfS <sub>2</sub><br>(II) | MoSSe/TiS <sub>2</sub><br>(III) | MoS <sub>2</sub> /SnO <sub>2</sub><br>(I) | MoSSe/ZrS <sub>2</sub><br>(II) | MoSSe/ZrS <sub>2</sub><br>(III) | MoSSe/SnO <sub>2</sub><br>(III) |
|------------|------------------|-------|--------------------------------|---------------------------------|-------------------------------------------|--------------------------------|---------------------------------|---------------------------------|
| $E_B$ (eV) | 1.5              | 1.8   | 0.44                           | 0.37                            | 1.3                                       | 0.42                           | 0.41                            | 1.3                             |

### VIII. CARRIER MOBILITY

$$\mu = \frac{2e\hbar^3 C}{3k_B T |m^*|^2 E_1^2} \quad (1)$$

In this expression  $C$  is defined as  $C = [\partial^2 E / \partial \delta^2] / S^0$ .  $E$  refers to the total energy of the system,  $\delta$  is the applied uniaxial strain, and  $S^0$  is the area of the optimized vdW HTS.  $m^*$  is the effective mass, expressed as  $m^* = \hbar^2 (\partial E^2 / \partial k^2)^{-1}$ .  $T$  represents temperature, and  $E_1$  is the deformation potential constant that is defined as  $\Delta E = E_1 (\Delta l / l_0)$ . Here,  $\Delta E$  is the energy shift of the band edge position with respect to the lattice strain  $\Delta l / l_0$ . The energies of the band edges (CBm or VBM) are obtained with vacuum level as the reference.
